# Supplementary material for: Blood pressure and bladder cancer risk in men by use of survival analysis and in interaction with NAT2 genotype, and by Mendelian randomization analysis
Source: PubMed Central journal article supplement (PMC7688142; doi:10.1371/journal.pone.0241711), 2020-11-25
Supplement: pone.0241711.s011.pdf [file pone.0241711.s011.pdf]

**S1 Table** : Baseline characteristics women in the Swedish cohorts and the UK-biobank

| <b>Characteristic</b>                               | <b>MDCS and MPP<br/>(n=23,484)</b> | <b>UK-biobank<br/>(n=221,114)</b> |
|-----------------------------------------------------|------------------------------------|-----------------------------------|
| <b>Baseline year, range</b>                         | 1974-1996                          | 2006-2010                         |
| <b>Baseline age, years, mean (SD)</b>               | 55.5 (8.7)                         | 57.2 (7.9)                        |
| <b>Category, n (%)</b>                              |                                    |                                   |
| <30                                                 | 411 (1.8)                          | 0 (0.0)                           |
| 30-44                                               | 1,010 (4.3)                        | 20,609 (9.2)                      |
| 45-59                                               | 14,968 (63.7)                      | 103,447 (46.9)                    |
| ≥60                                                 | 7,095 (30.2)                       | 97,058 (43.9)                     |
| <b>Smoking status, n (%)*</b>                       |                                    |                                   |
| Never smoker                                        | 9,931 (44.2)                       | 130,889 (59.4)                    |
| Ex-smoker                                           | 5,537 (24.7)                       | 70,339 (31.9)                     |
| Current smoker                                      | 6,989 (31.1)                       | 19,126 (8.7)                      |
| <b>Pack years among current smokers, n (%)*</b>     |                                    |                                   |
| <10                                                 | 1,825 (26.3)                       | 2,492 (15.3)                      |
| 10-19.9                                             | 1,521 (21.9)                       | 4,013 (24.8)                      |
| ≥20                                                 | 3,606 (51.8)                       | 9,710 (59.9)                      |
| <b>Blood pressure, mm Hg, mean (SD)</b>             |                                    |                                   |
| Systolic blood pressure                             | 136.2 (20.4)                       | 137.6 (20.2)                      |
| Diastolic blood pressure                            | 83.6 (9.7)                         | 80.7 (10.5)                       |
| <b>Category, systolic/diastolic, n (%)</b>          |                                    |                                   |
| <140/90 mm Hg                                       | 12,023 (51.2)                      | 120,109 (54.3)                    |
| 140/90-159/99 mm Hg                                 | 7262 (30.9)                        | 66,059 (29.9)                     |
| ≥160/100 mm Hg                                      | 4,199 (17.9)                       | 34,946 (15.8)                     |
| <b>BMI, kg/m<sup>2</sup>, mean (SD)<sup>†</sup></b> |                                    |                                   |
| <18.5                                               | 443 (1.9)                          | 1,627 (0.7)                       |
| 18.5-24.9                                           | 12,305 (52.5)                      | 86,149 (39.1)                     |
| 25-29.9                                             | 7,531 (32.1)                       | 81,613 (37.0)                     |
| ≥30                                                 | 3,183 (13.5)                       | 51,098 (23.2)                     |
| <b>Mean follow-up time, years (SD)</b>              | 20.5 (7.8)                         | 5.7 (1.2)                         |
| <b>Follow-up time, n (%)</b>                        |                                    |                                   |

|       |               |                |
|-------|---------------|----------------|
| <5    | 2,523 (10.7)  | 66,739 (30.2)  |
| 5-9   | 1,465 (6.2)   | 154,375 (69.8) |
| 10-14 | 1,930 (8.3)   | 0 (0.0)        |
| ≥15   | 17,566 (74.8) | 0 (0.0)        |

\* Smoking status was missing for 760 (0.3%) women in the UK-biobank and for 1,027 (4.4%)

women in the MDCS and MPP combined. Accumulated pack-years among current smokers, excluding 38 (0.5%) and 2,911 (1.3%) current smokers with missing pack-years data in the MPP and MDC combined and UK-biobank respectively.

† BMI data was missing for 627 women in the UK-biobank and 22 women in MDCS and MPP combined.
