# Supplementary material for: Blood pressure and bladder cancer risk in men by use of survival analysis and in interaction with NAT2 genotype, and by Mendelian randomization analysis
Source: PLoS One. 2020 Nov 25;15(11):e0241711. doi: 10.1371/journal.pone.0241711 (PMC7688142; doi:10.1371/journal.pone.0241711)
Supplement: S1 File — (XLSX) [file pone.0241711.s001.xlsx]

## Sheet: Found SNPS
SNP	Chr	EA	OA	EAF	Exposure_beta
rs2932538	1	G	A	0.75	0.388	EA=Effect allele
rs17367504	1	A	G	0.85	0.903	OA=Other allele
rs7515635	1	T	C	0.468	0.307	Effect allele frequency
rs880315	1	C	T	0.359	0.475
rs17037390	1	G	A	0.845	0.908
rs1620668	1	G	A	0.178	0.535
rs2493134	1	C	T	0.421	0.413
rs2586886	2	C	T	0.401	0.404
rs419076	3	T	C	0.47	0.409
rs11128722	3	G	A	0.436	0.3103
rs711737	3	A	C	0.604	0.334
rs6442101	3	T	C	0.692	0.396
rs6779380	3	C	T	0.461	0.439
rs13107325	4	C	T	0.95	0.981
rs1458038	4	T	C	0.29	0.706
rs2291435	4	C	T	0.476	0.3441
rs17010957	4	C	T	0.143	0.498
rs4691707	4	G	A	0.348	0.349
rs1173771	5	G	A	0.60	0.504
rs11953630	5	C	T	0.63	0.412
rs12656497	5	C	T	0.597	0.487
rs1799945	6	G	C	0.14	0.627
rs805303	6	G	A	0.61	0.376
rs1361831	6	C	T	0.459	0.482
rs6919440	6	G	A	0.430	0.337
rs11556924	7	C	T	0.616	0.2705
rs3735533	7	C	T	0.919	0.798
rs2969070	7	G	A	0.361	0.2975
rs12705390	7	A	G	0.227	0.619
rs2898290	8	T	C	0.491	0.377
rs10760117	9	T	G	0.415	0.283
rs6271	9	C	T	0.928	0.5911
rs4373814	10	C	G	0.45	0.373
rs932764	10	G	A	0.44	0.484
rs4590817	10	G	C	0.84	0.646
rs11191548	10	T	C	0.91	1.095
rs1813353	10	T	C	0.68	0.569
rs12243859	10	C	T	0.674	0.402
rs7076398	10	T	A	0.812	0.563
rs12247028	10	G	A	0.389	0.364
rs943037	10	C	T	0.913	1.133
rs740746	10	A	G	0.73	0.486
rs7129220	11	A	G	0.11	0.619
rs381815	11	T	C	0.26	0.575
rs3741378	11	C	T	0.863	0.486
rs633185	11	C	G	0.72	0.565
rs7103648	11	G	A	0.386	0.3349
rs751984	11	T	C	0.879	0.4074
rs592373	11	A	G	0.64	0.484
rs1450271	11	T	C	0.468	0.413
rs1156725	11	C	T	0.196	0.447
rs17249754	12	G	A	0.84	0.928
rs3184504	12	T	C	0.47	0.598
rs10850411	12	T	C	0.70	0.354
rs11105354	12	A	G	0.84	0.909
rs1378942	15	C	A	0.35	0.613
rs936226	15	C	T	0.278	0.549
rs2521501	15	T	A	0.31	0.650
rs17608766	17	C	T	0.14	0.556
rs12940887	17	T	C	0.38	0.362
rs7213273	17	G	A	0.342	0.413
rs12958173	18	A	C	0.306	0.3614
rs4247374	19	C	T	0.857	0.5933
rs1327235	20	G	A	0.46	0.340
rs6015450	20	G	A	0.12	0.896
rs6026748	20	A	G	0.125	0.867
rs12627651	21	A	G	0.288	0.3905

## Sheet: Extracted SNPs
SNPs that were found in the UK-biobank in the first extraction phase
SNPs	Chr	EA	OA	EAF	Exposure_beta
rs17367504	1	A	G	0.85	0.903
rs2932538	1	G	A	0.75	0.388
rs2586886	2	C	T	0.401	0.404
rs419076	3	T	C	0.47	0.409
rs1458038	4	T	C	0.29	0.706
rs13107325	4	C	T	0.95	0.981
rs1173771	5	G	A	0.60	0.504
rs11953630	5	C	T	0.63	0.412
rs1799945	6	G	C	0.14	0.627
rs805303	6	G	A	0.61	0.376
rs1361831	6	C	T	0.459	0.482
rs3735533	7	C	T	0.919	0.798
rs11556924	7	C	T	0.616	0.2705
rs10760117	9	T	G	0.415	0.283
rs6271	9	C	T	0.928	0.5911
rs4373814	10	C	G	0.45	0.373
rs4590817	10	G	C	0.84	0.646
rs932764	10	G	A	0.44	0.484
rs11191548	10	T	C	0.91	1.095
rs7129220	11	A	G	0.11	0.619
rs381815	11	T	C	0.26	0.575
rs3741378	11	C	T	0.863	0.486
rs17249754	12	G	A	0.84	0.928
rs3184504	12	T	C	0.47	0.598
rs10850411	12	T	C	0.70	0.354
rs936226	15	C	T	0.278	0.549
rs1378942	15	C	A	0.35	0.613
rs17608766	17	C	T	0.14	0.556
rs4247374	19	C	T	0.857	0.5933
rs1327235	20	G	A	0.46	0.340
rs12627651	21	A	G	0.288	0.3905

## Sheet: Proxies
For SNPs that were not initially extracted in the UK-biobank, suitable SNPs were found
SNP	Chr	EA	OA	Exposure_beta	EAF	Proxy	EA_2	OA_2	EAF_2	R2	Each of the selected proxies had an r2 of ≥0.8 and the correlation between EAF and EAF_2 is greater than 95% high quality proxy selection and harmonization
rs7515635	1	T	C	0.307	0.468	rs1540976	G	A	0.47	1.0
rs880315	1	C	T	0.475	0.359	rs12046278	C	T	0.35	0.90
rs17037390	1	G	A	0.908	0.845	rs17367504	A	G	0.84	1.0
rs2493134	1	C	T	0.413	0.421	rs699	G	A	0.419	1.0
rs11128722	3	G	A	0.3103	0.436	rs6806067	A	C	0.431	0.98
rs6442101	3	T	C	0.396	0.692	rs4293721	A	C	0.671	1.0
rs2291435	4	C	T	0.3441	0.476	rs10004996	T	C	0.467	1.0
rs6919440	6	G	A	0.337	0.430	rs2396004	A	G	0.443	1.0
rs2969070	7	G	A	0.2975	0.361	rs1548594	G	C	0.363	1.0
rs12705390	7	A	G	0.619	0.227	rs17477177	C	T	0.20	1.0
rs2898290	8	T	C	0.377	0.491	rs13280813	G	T	0.528	0.81
rs1813353	10	T	C	0.569	0.68	rs6482423	T	C	0.666	0.97
rs7076398	10	T	A	0.563	0.812	rs1530440	C	T	0.815	0.92
rs7103648	11	G	A	0.3349	0.386	rs2293579	A	G	0.386	1.0
rs751984	11	T	C	0.4074	0.879	rs7125196	T	C	0.878	0.95
rs1450271	11	T	C	0.413	0.468	rs2923089	T	C	0.466	1.0
rs1156725	11	C	T	0.447	0.196	rs10741693	A	G	0.205	0.97
rs11105354	12	A	G	0.909	0.84	rs2681492	T	C	0.823	1.0
rs2521501	15	T	A	0.650	0.31	rs7497304	T	G	0.320	0.97
rs12940887	17	T	C	0.362	0.38	rs16948048	G	A	0.362	0.98
rs7213273	17	G	A	0.413	0.342	rs1053739	A	G	0.342	1.0
rs6015450	20	G	A	0.896	0.12	rs16982520	G	A	0.120	0.96

## Sheet: Excluded SNPs
SNPs that were found but not included in the final analysis
Main SNP	Reason
rs1620668	No proxy found
rs711737	No proxy found
rs6779380	In LD with rs419076
rs4691707	No proxy found
rs17010957	No proxy found
rs12656497	In LD with rs1173771
rs12243859	No proxy found
rs943037	In LD with rs11191548
rs740746	No proxy found
rs633185	No proxy found
rs592373	No proxy found
rs12958173	No proxy found
rs6026748	In LD with rs6015450
rs12247028	No proxy found

## Sheet: Extracted SNP+Proxies_beforeQC
Total number of SNPs before final quality control in Plink
SNP	Chr
rs17367504	1
rs2932538	1
rs1540976	1
rs12046278	1
rs699	1
rs2586886	2
rs419076	3
rs6806067	3
rs4293721	3
rs1458038	4
rs13107325	4
rs10004996	4
rs1173771	5
rs11953630	5
rs1799945	6
rs805303	6
rs1361831	6
rs2396004	6
rs3735533	7
rs11556924	7
rs1548594	7
rs17477177	7
rs13280813	8
rs10760117	9
rs6271	9
rs4373814	10
rs4590817	10
rs932764	10
rs11191548	10
rs6482423	10
rs1530440	10
rs7129220	11
rs381815	11
rs3741378	11
rs2293579	11
rs7125196	11
rs2923089	11
rs10741693	11
rs17249754	12
rs3184504	12
rs10850411	12
rs2681492	12
rs936226	15
rs1378942	15
rs7497304	15
rs17608766	17
rs16948048	17
rs1053739	17
rs4247374	19
rs1327235	20
rs16982520	20
rs12627651	21

## Sheet: Overall Summary
Systolic blood pressure
Initial phase
67 SNPs found
31 SNPs: extracted
22 SNPs: proxies found
4 in Linkage disequilibrium
10 SNPs: no suitable proxy found
sub-total: 53 SNPs
Phase 2 (Quality control)
4 SNP: out of Hardy-Weinberg equilibrium
1 SNP: in Linkage disequilibrium
SNPs for final analysis
47 SNPs
